# Supplementary material for: Detection of methylation, acetylation and glycosylation of protein residues by monitoring 13 C chemical-shift changes: A quantum-chemical study
Source: PeerJ journal article supplement (doi:10.7717/peerj.2253), 2016-07-21
Supplement: PTM_Suplemental_Information.pdf [file PTM_Suplemental_Information.pdf]

## Supplemental Information for

### **Detection of methylation, acetylation and glycosylation of protein residues by monitoring $^{13}\text{C}$ chemical-shift changes: A quantum-chemical study**

Pablo G. Garay,<sup>1</sup> Osvaldo A. Martin,<sup>1</sup> Harold A. Scheraga<sup>2</sup> and Jorge A. Vila<sup>1,§</sup>

<sup>1</sup>*IMASL-CONICET, Universidad Nacional de San Luis, Italia 1556, 5700-San Luis, Argentina;*

<sup>2</sup>*Baker Laboratory of Chemistry, Cornell University, Ithaca, NY, USA.*

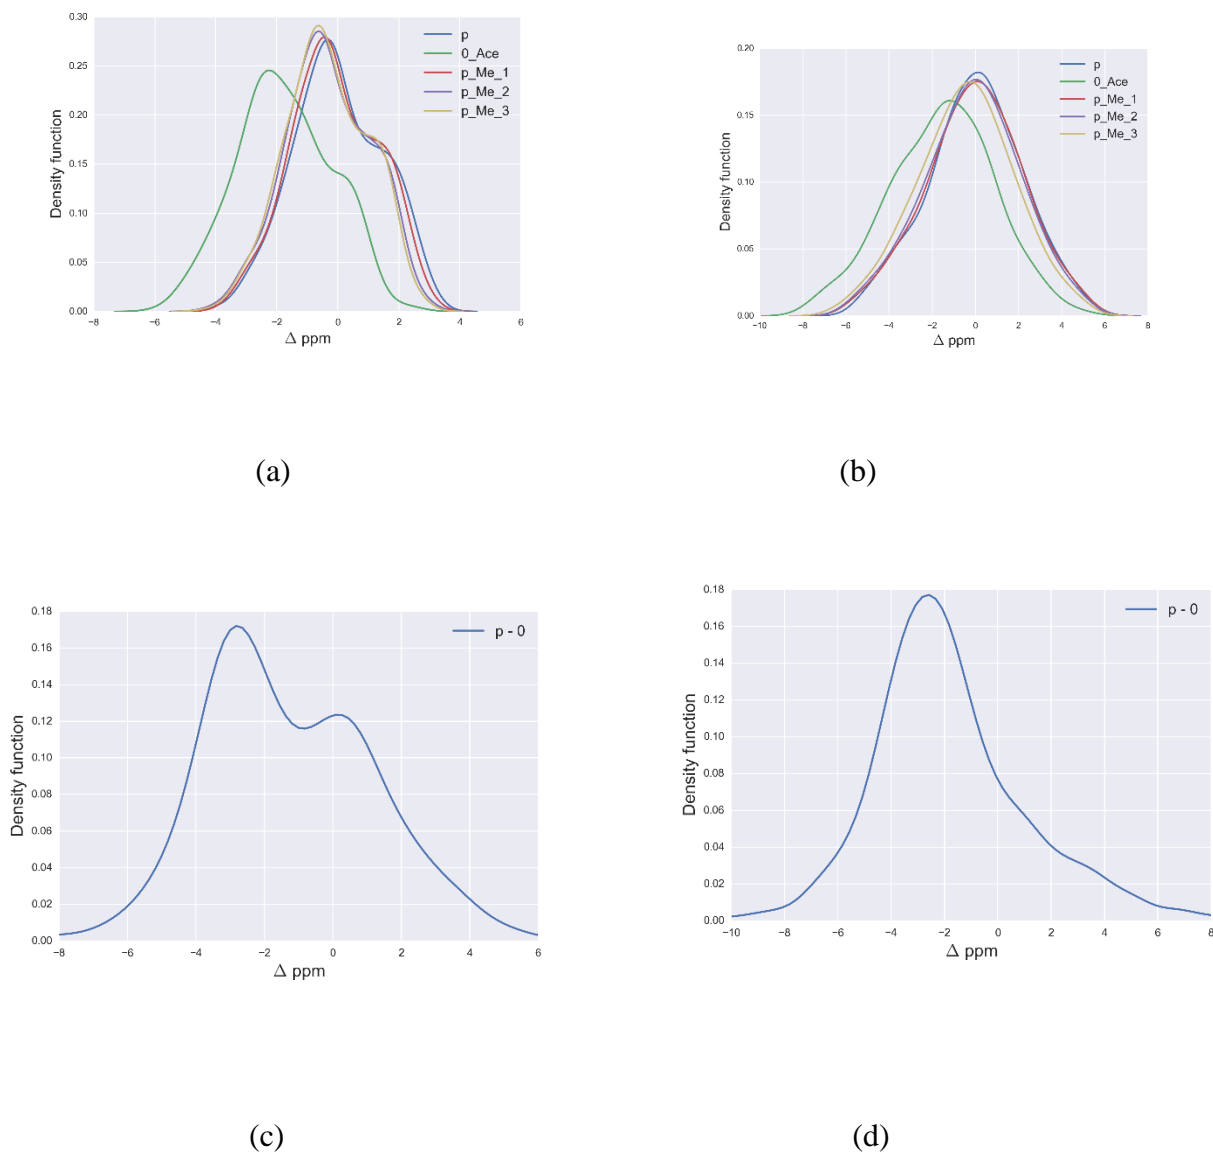

**Figure S1.-** (a) Kernel Density Estimation of the  $\Delta$  values of the  $^{13}\text{C}^\alpha$  nucleus of charged non-modified (blue-line), acetylated (green-line), *mono*- (red-line), *di*- (violet-line), and *tri*-methylated (yellow-line) Lys; (b) same as (a) for the  $^{13}\text{C}^\beta$  nucleus; (c) Kernel Density Estimation of the  $\Delta$  values of the  $^{13}\text{C}^\alpha$  nucleus of non-modified Lys upon protonation/deprotonation; (d) same as (c) for the  $^{13}\text{C}^\beta$  nucleus.

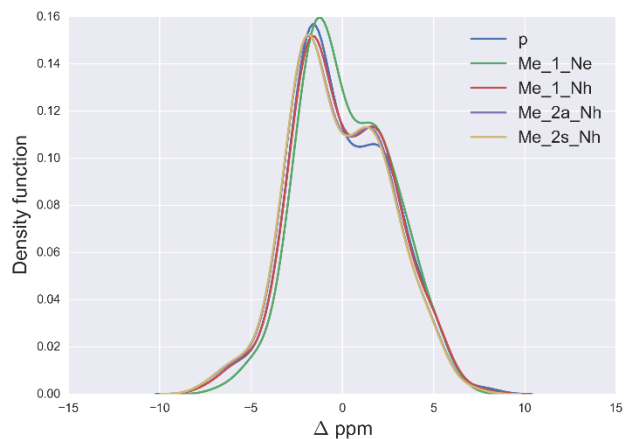

(a)

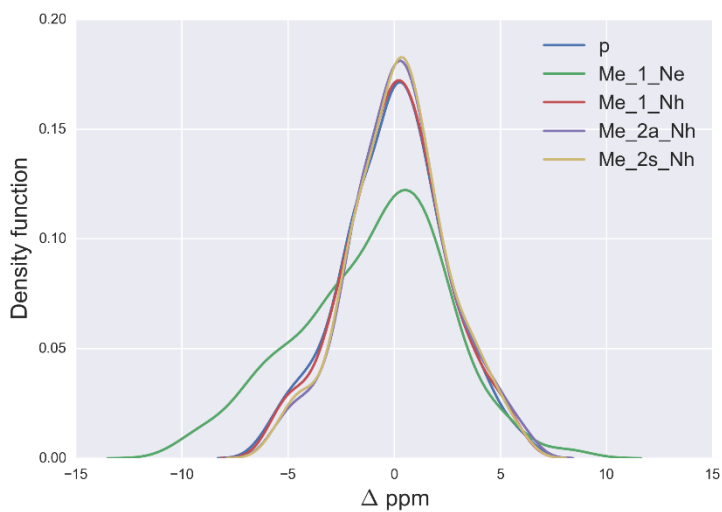

(b)

**Figure S2.-** (a) Kernel Density Estimation of the  $\Delta$  values of the  $^{13}\text{C}^\alpha$  nucleus of *non*-modified (blue-line),  $N^\epsilon$  (green-line) and  $N^\eta$  (red-line) *mono*-methylated, asymmetric (violet-line) and symmetric (yellow-line) *di*-methylated Arg; (b) same as (a) for the  $^{13}\text{C}^\beta$  nucleus.

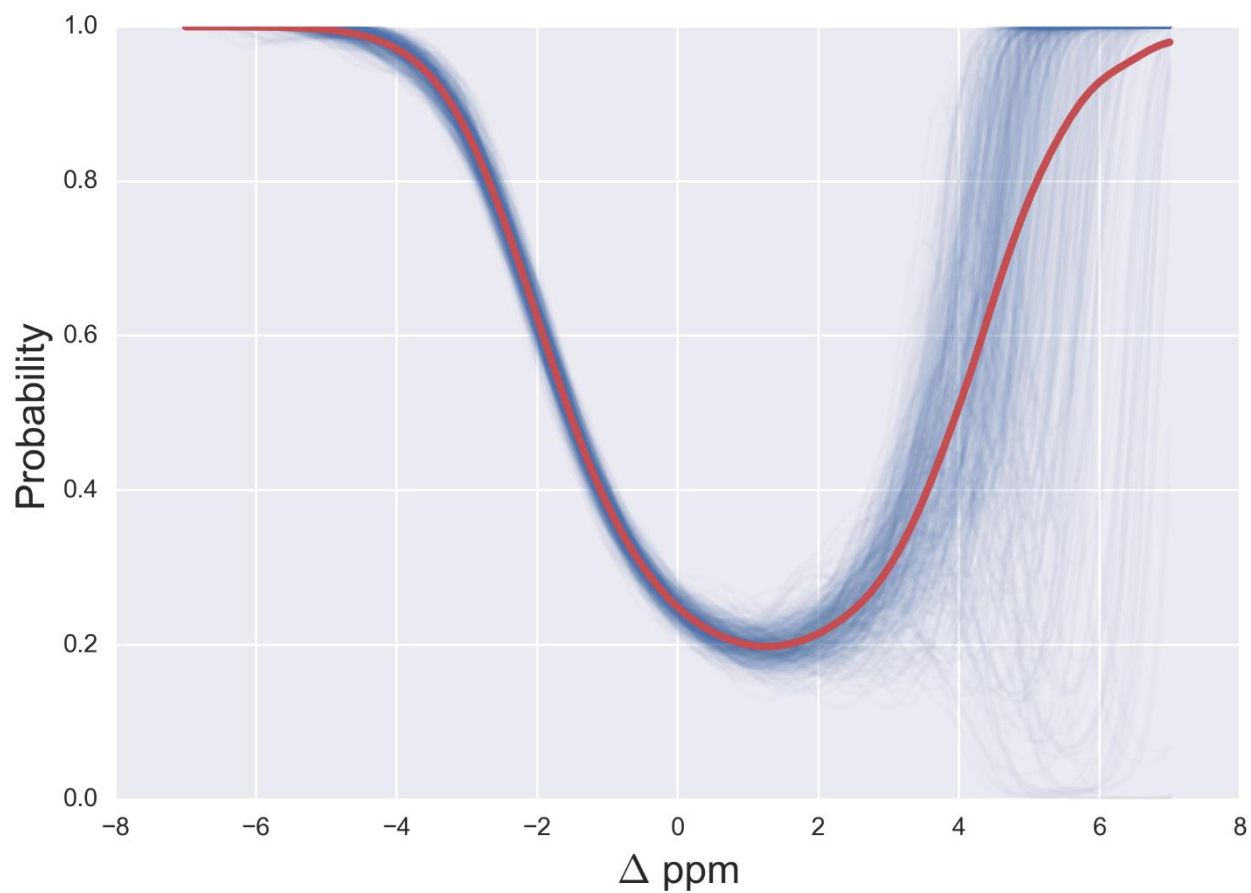

**Figure S3.** Probability to detect glycosylation of Ser, i.e., either  $\alpha$ -D-GalpNAc-(1-O)-Ser or  $\beta$ -D-GlcpNAc-(1-O)-Ser, as a function of the  $\Delta$  values of the  $^{13}\text{C}^\beta$  nucleus of Ser (shown in Figure 4 in the main text). The red line represents the expected probability-profile and the blue lines the uncertainty in the data according to the Bayesian model.

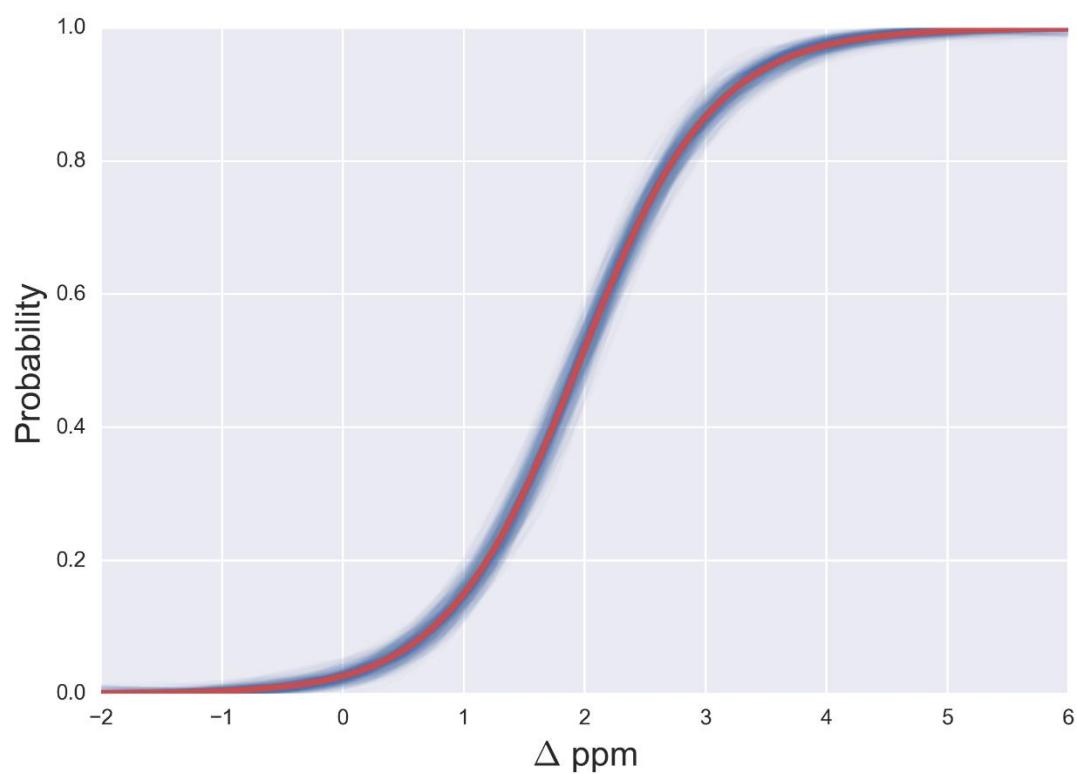

**Figure S4.** Probability to detect glycosylation of Thr [ $\alpha$ -D-GalpNAc-(1-O)-Thr], as a function of the chemical-shift differences ( $\Delta$ ) for the  $^{13}\text{C}^\beta$  nucleus of Thr (shown in Figure 6 in the main text). The red line represents the expected probability-profile and the blue lines the uncertainty in the data according to the Bayesian model.

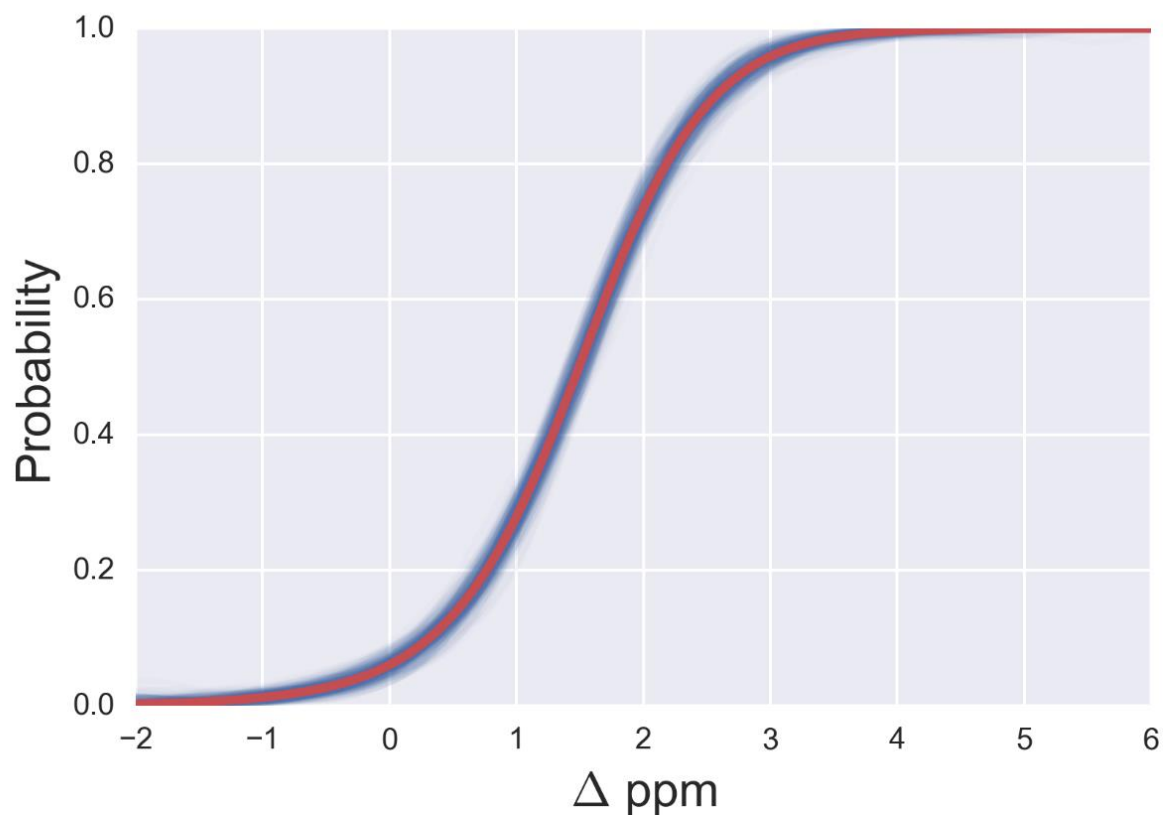

**Figure S5.-** Probability to detect glycosylation of Asn [ $\beta$ -D-GlcpNAc-(1-N)-Asn], as a function of the chemical-shift differences ( $\Delta$ ) for the  $^{13}\text{C}^\gamma$  nucleus of Asn (shown in Figure 7 in the main text). The red line represents the expected probability-profile and the blue lines the uncertainty in the data according to the Bayesian model.

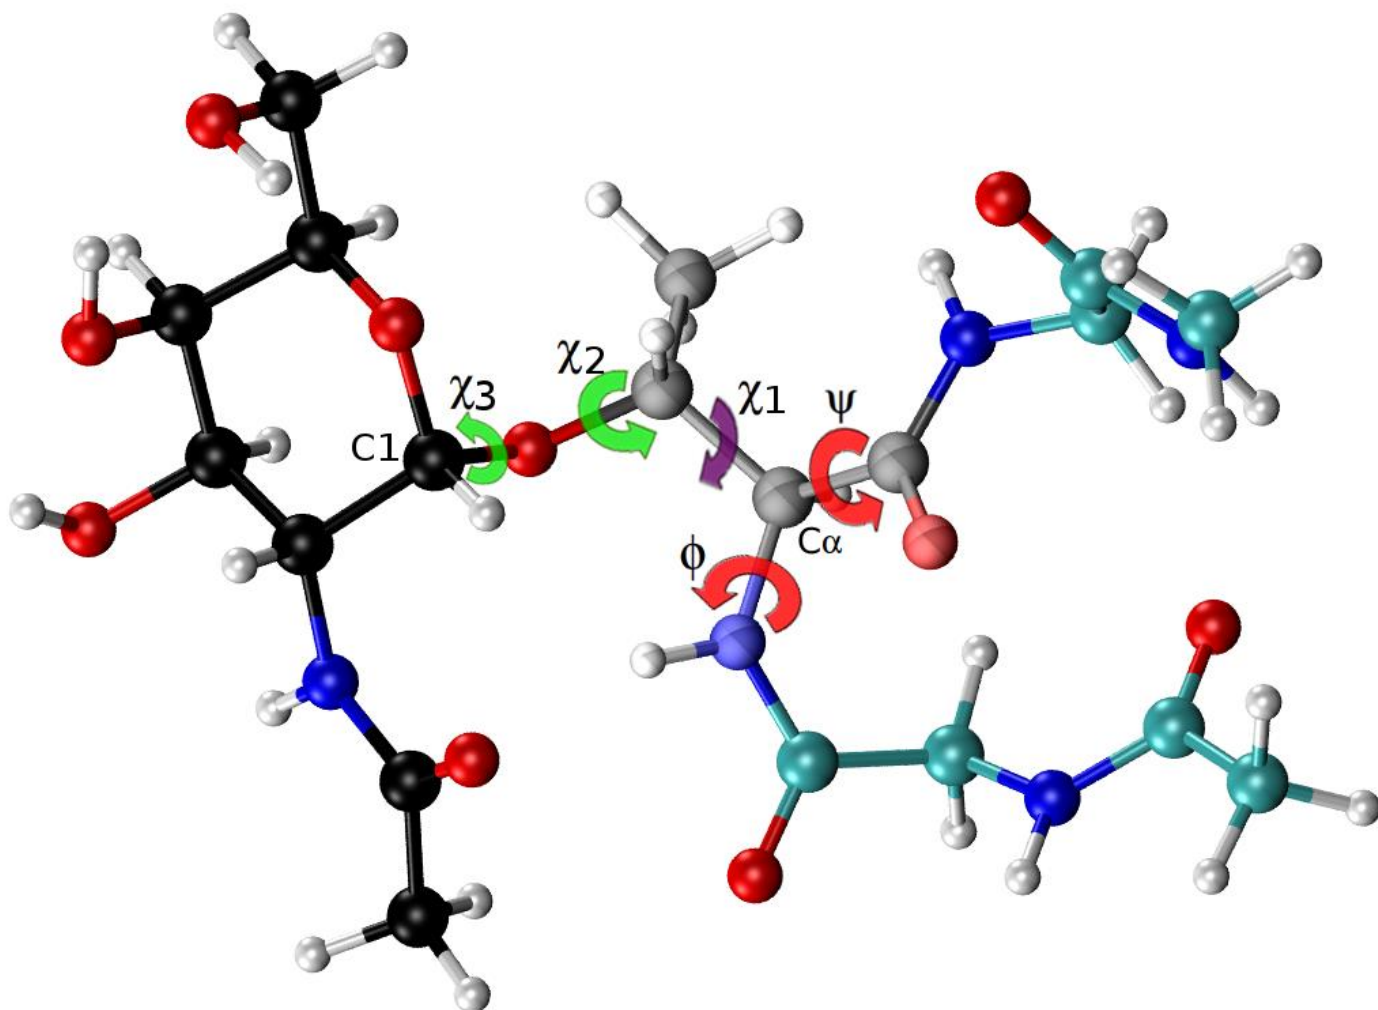

**Figure S6.-** Ball and stick representation of a glycan-amino acid residue, namely for  $\alpha$ -D-GalpNAc-(1-O)-Thr with “1” representing C1 of the glycan and “O” representing the oxygen of the side-chain of Thr in an Ac-Gly-Thr-Gly-Nme tripeptide, in an arbitrary conformation. The  $\chi_2$  and  $\chi_3$  torsional angle, for the carbohydrate group ( $\alpha$ -D-GalpNAc), are highlighted in green, while the one corresponding to the amino-acidic residue (Thr) are in red, for  $\phi$ ,  $\psi$ , and purple, for  $\chi_1$ .

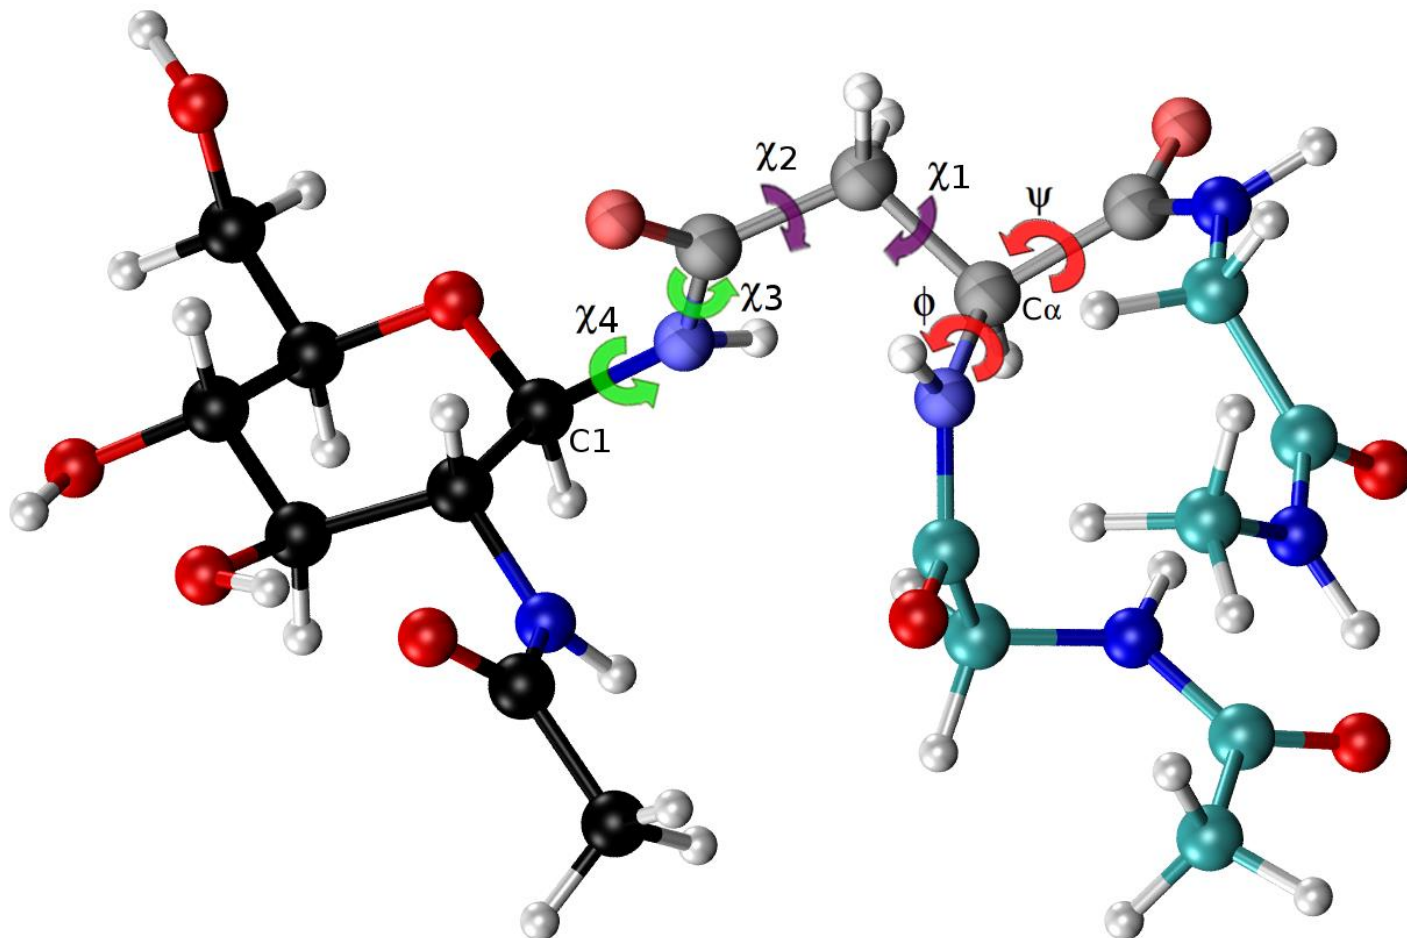

**Figure S7.-** Ball and stick representation of a glycan-amino acid residue, namely for  $\beta$ -D-GlcNAc-(1-N)-Asn with “1” representing C1 of the glycan and “N” representing the nitrogen of the side-chain of Asn in an Ac-Gly-Asn-Gly-Nme tripeptide, in an arbitrary conformation. The  $\chi_3$  and  $\chi_4$  torsional angles, for the carbohydrate group ( $\beta$ -D-GalpNAc), are highlighted in green, while the corresponding one for the amino-acidic residue (Asn) are highlighted in red, for  $\phi$ ,  $\psi$ , and purple, for  $\chi_1$  and  $\chi_2$ .
